# Supplementary material
Source: Springer Nature journal article supplement (https://www.springermedizin.de/resource/supplementary/13012_2013_754_MOESM3_ESM.pdf/9630586)
Supplement: MOESM3 [file 9630586]

### Additional file 3 – Attenuation-corrected correlations

|     |                            | D1 | D2  | D3  | D4  | D5  | D6  | D7  | D8  | D9  | D10 | D11 | D12 | D13 | D14 | D15 | D16  | D17  | D18  |
|-----|----------------------------|----|-----|-----|-----|-----|-----|-----|-----|-----|-----|-----|-----|-----|-----|-----|------|------|------|
| D1  | Knowledge                  |    | .80 | .74 | .40 | .11 | .43 | .26 | .19 | .26 | .05 | .16 | .17 | .07 | .17 | .38 | -.34 | .33  | .28  |
| D2  | Skills                     |    |     | .86 | .47 | .15 | .53 | .41 | .21 | .21 | .02 | .16 | .26 | .04 | .28 | .37 | -.36 | .47  | .45  |
| D3  | Social/professional R&I    |    |     |     | .39 | .10 | .53 | .46 | .23 | .19 | .10 | .11 | .26 | .12 | .31 | .29 | -.29 | .38  | .39  |
| D4  | Beliefs about capabilities |    |     |     |     | .37 | .62 | .46 | .30 | .70 | .15 | .38 | .37 | .26 | .49 | .55 | -.42 | .79  | .66  |
| D5  | Optimism                   |    |     |     |     |     | .30 | .10 | .08 | .29 | .11 | .28 | .23 | .02 | .19 | .37 | -.18 | .27  | .20  |
| D6  | Beliefs about consequences |    |     |     |     |     |     | .58 | .40 | .42 | .16 | .34 | .50 | .32 | .53 | .59 | -.36 | .64  | .51  |
| D7  | Intentions                 |    |     |     |     |     |     |     | .39 | .28 | .19 | .28 | .45 | .21 | .47 | .41 | -.35 | .55  | .53  |
| D8  | Goals                      |    |     |     |     |     |     |     |     | .23 | .08 | .20 | .31 | .09 | .31 | .29 | -.30 | .34  | .34  |
| D9  | Innovation                 |    |     |     |     |     |     |     |     |     | .41 | .36 | .28 | .35 | .45 | .45 | -.38 | .55  | .57  |
| D10 | Socio-political context    |    |     |     |     |     |     |     |     |     |     | .21 | .26 | .46 | .30 | .19 | -.02 | .20  | .16  |
| D11 | Organization               |    |     |     |     |     |     |     |     |     |     |     | .23 | .19 | .36 | .33 | -.31 | .23  | .24  |
| D12 | Patient                    |    |     |     |     |     |     |     |     |     |     |     |     | .22 | .53 | .43 | -.28 | .44  | .46  |
| D13 | Innovation strategy        |    |     |     |     |     |     |     |     |     |     |     |     |     | .30 | .19 | -.03 | .14  | .10  |
| D14 | Social influences          |    |     |     |     |     |     |     |     |     |     |     |     |     |     | .43 | -.25 | .56  | .52  |
| D15 | Positive emotions          |    |     |     |     |     |     |     |     |     |     |     |     |     |     |     | -.61 | .59  | .45  |
| D16 | Negative emotions          |    |     |     |     |     |     |     |     |     |     |     |     |     |     |     |      | -.46 | -.38 |
| D17 | Behavioral regulation      |    |     |     |     |     |     |     |     |     |     |     |     |     |     |     |      |      | .63  |
| D18 | Nature of the behaviors    |    |     |     |     |     |     |     |     |     |     |     |     |     |     |     |      |      |      |
